# Supplementary figures and images for: Sol-gel reactions of 3-glycidoxypropyltrimethoxysilane in a highly basic aqueous solution
Source: Royal Society of Chemistry journal article supplement (doi:10.1039/b905830c), 2009-01-01

## SUPPLEMENTARY INFORMATION 1

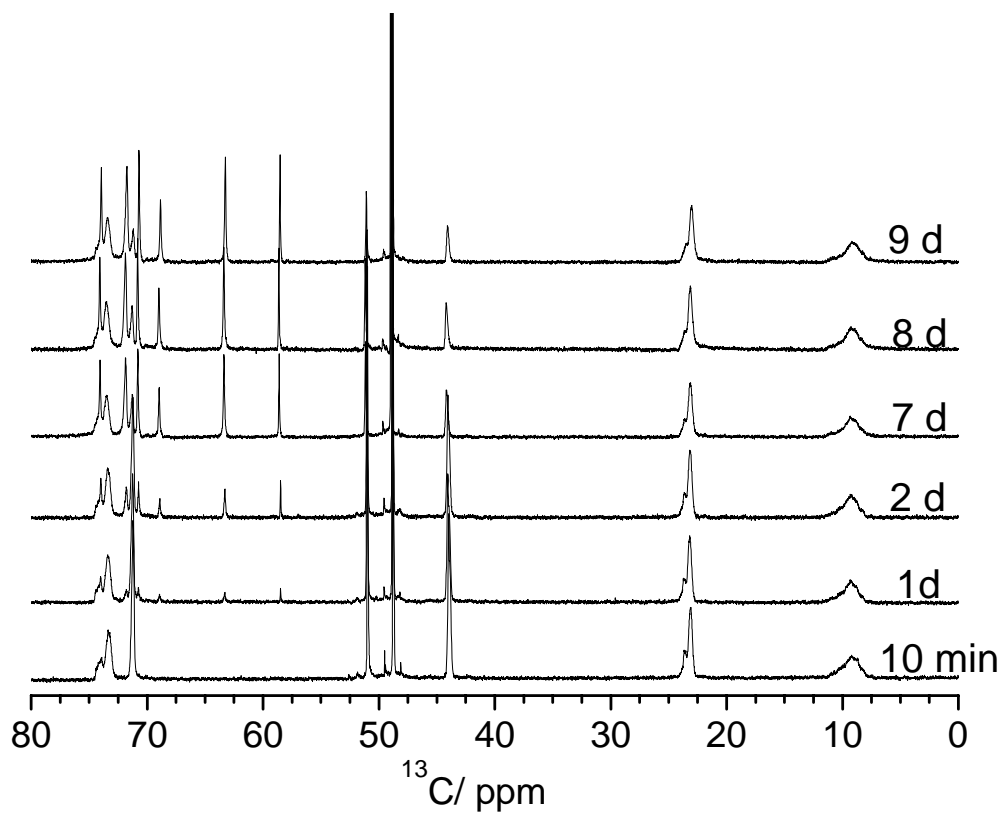

S.I 1

Supplement: b905830c.pdf [file b905830c.pdf]
